# Supplementary material
Source: Royal Society of Chemistry journal article supplement (doi:10.1039/d6an00072j)
Supplement: d6an00072j1.pdf [file d6an00072j1.pdf]

## Supporting Information:

### Monte Carlo-like peaks assignment using Time-Resolved in-situ NMR approach for complex reaction monitoring. A case of photodegradation of Retinyl Acetate.

Farwa Khalid<sup>a‡</sup>, Chunchesh Malangi Gajendramurthy<sup>a‡\*</sup>, Franz F. Westermair<sup>b</sup>, Lena Miler<sup>c</sup>, Ruth M. Gschwind<sup>b</sup>, Tomasz Ratajczyk<sup>a</sup>, Mateusz Urbańczyk<sup>a\*</sup>

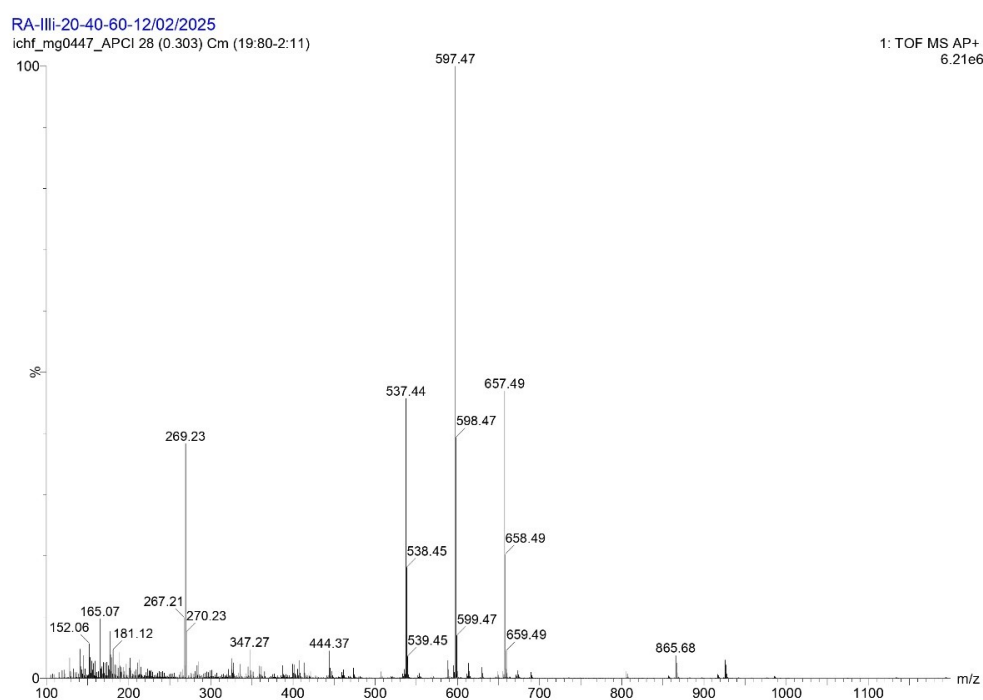

Fig. S1. Mass spectrum overview of sample mixture (positive mode) after 44 hours of illumination showing  $m/z$  of 267, 536, 597, and 656 as a major product.

<sup>a</sup>*Institute of Physical Chemistry,  
Polish Academy of Sciences  
Kasprzaka 44/52, 01-224 Warsaw, Poland*  
<sup>b</sup>*Faculty of Chemistry and Pharmacy  
University of Regensburg,  
Universitätsstraße 31, 93053 Regensburg, Germany*  
<sup>c</sup>*Faculty of Physics  
University of Warsaw,  
Pasteura 5, 02-093, Warsaw, Poland*  
*\* [murbanczyk@ichf.edu.pl](mailto:murbanczyk@ichf.edu.pl) [chunchesh.mg@ichf.edu.pl](mailto:chunchesh.mg@ichf.edu.pl)*  
<sup>‡</sup> Those authors contributed equally

| Entry | Compound Name        | Molecular Mass (g/mol) |
|-------|----------------------|------------------------|
| 1.    | Retinyl acetate (RA) | 328.49                 |
| 2.    | Anhydro retinol (AR) | 268                    |
| 3.    | Homodimer of AR      | 537                    |
| 4.    | Homodimer of RA      | 656                    |
| 5.    | Dimer of AR with RA  | 596                    |

Table S1. List of all the reactants of the studied photodegradation process.

| Entry | Compound Name                               | Molecular mass(M) (g/mol) | Diffusion coefficient (D) (m/s <sup>2</sup> ) |
|-------|---------------------------------------------|---------------------------|-----------------------------------------------|
| 1.    | Retinoic Acid                               | 300.44                    | 3.63E-10                                      |
| 2.    | Retinyl Acetate                             | 328.49                    | 3.40 E-10                                     |
| 3.    | Reaction mixture at the end of illumination | 545                       | 1.78E-10                                      |

Table S2. The Reference compound used to determine the scaling coefficient  $k=3.97e-7$  and  $\alpha=-1.22$ .
